# Supplementary material for: RNA binding protein RBM46 regulates mitotic-to-meiotic transition in spermatogenesis
Source: PubMed Central journal article supplement — Sci Adv. 2022 Aug 24;8(34):eabq2945. doi: 10.1126/sciadv.abq2945 (PMC9401620; doi:10.1126/sciadv.abq2945), 2022-08-24
Supplement: sciadv.abq2945_sm.pdf [file sciadv.abq2945_sm.pdf]

Supplementary Materials for  
**RNA binding protein RBM46 regulates mitotic-to-meiotic transition  
in spermatogenesis**

Baomei Qian *et al.*

Corresponding author: Lan Ye, lanye@njmu.edu.cn; Jian Zhou, jianzhou@njmu.edu.cn;  
Mingyan Lin, linmingyan@njmu.edu.cn

*Sci. Adv.* **8**, eabq2945 (2022)  
DOI: 10.1126/sciadv.abq2945

**This PDF file includes:**

Figs. S1 to S8

## SUPPLEMENTARY MATERIALS

A

P12 WT YTHDC2 IP-MS targets

| Enriched GO biological process terms                         | <i>P</i> -value |
|--------------------------------------------------------------|-----------------|
| mRNA processing (GO:0006397)                                 | 1.50E-45        |
| ribonucleoprotein complex biogenesis (GO:0022613)            | 4.57E-43        |
| RNA splicing, via transesterification reactions (GO:0000375) | 1.21E-36        |
| regulation of mRNA metabolic process(GO:1903311)             | 4.76E-29        |
| RNA localization (GO:0006403)                                | 6.67E-27        |
| RNA transport (GO:0050658)                                   | 1.98E-22        |
| mRNA catabolic process(GO:0006402)                           | 1.63E-19        |
| ncRNA processing(GO:0034470)                                 | 3.50E-17        |

B

P21 WT YTHDC2 IP-MS targets

| Enriched GO biological process terms              | <i>P</i> -value |
|---------------------------------------------------|-----------------|
| mRNA processing (GO:0006397)                      | 1.33E-59        |
| RNA splicing (GO:0008380)                         | 4.18E-57        |
| ribonucleoprotein complex biogenesis (GO:0022613) | 2.58E-51        |
| ribonucleoprotein complex assembly (GO:0022618)   | 3.15E-46        |
| regulation of mRNA metabolic process (GO:1903311) | 1.29E-35        |
| regulation of translation (GO:0006417)            | 2.86E-35        |
| RNA localization (GO:0006403)                     | 3.94E-31        |

C

P21 WT YTHDC2 IP-MS

| Protein identified | Unique peptides |
|--------------------|-----------------|
| <b>YTHDC2-IP</b>   |                 |
| YTHDC2             | 57              |
| MEIOC              | 44              |
| UPF1               | 29              |
| DDX4               | 20              |
| PABPC1             | 19              |
| MOV10              | 18              |
| CNOT1              | 14              |
| RBM46              | 13              |
| CNOT10             | 10              |
| CNOT9              | 4               |

**Fig. S1. Mass spectrometry analysis of YTHDC2 immunoprecipitated complexes from P21 mouse testes.** (A) Gene ontology analysis of RBM46 interactors in mouse testes at P12. (B) GO analysis of RBM46 interactors in mouse testes at P21. (C) Selective YTHDC2-associated protein candidates identified by mass spectrometry analysis from P21 mouse testes (n=5).

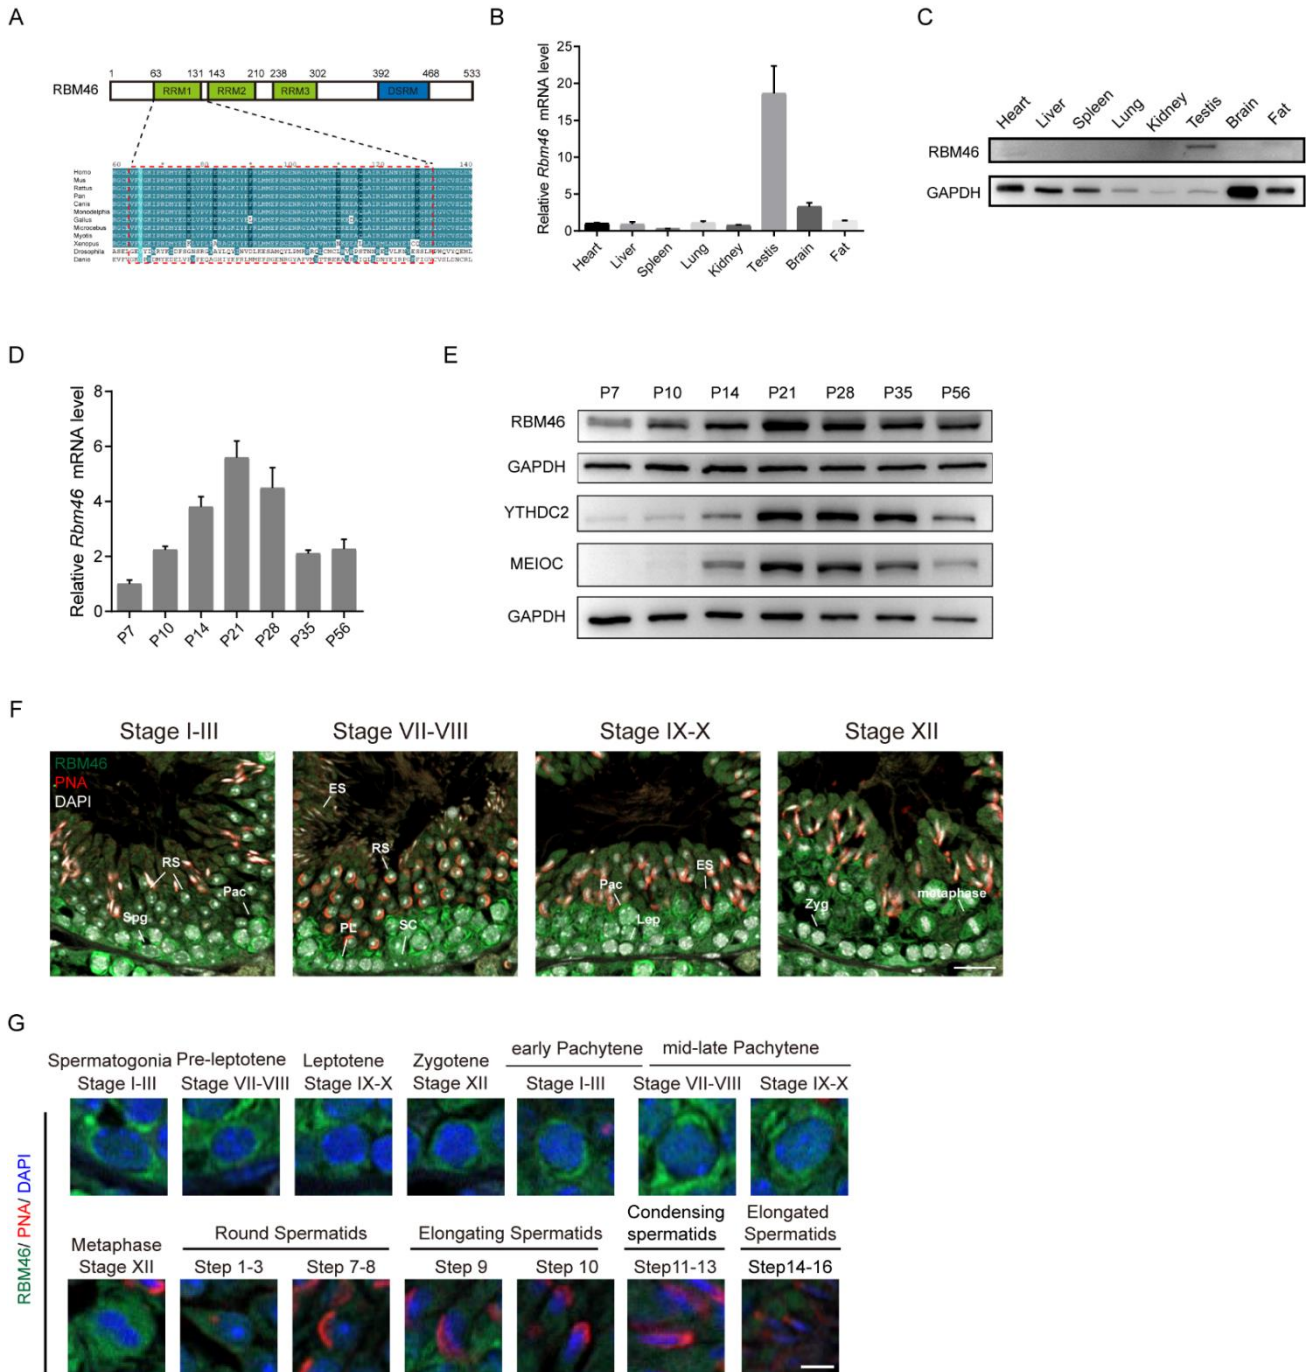

**Fig. S2. *Rbm46* is a conserved gene and its expression increases at the onset of meiosis.** (A) Schematic representation of RBM46 protein structure. The mouse *Rbm46* gene contains 5 exons. The RNA binding domains (green boxes) are highly conserved, and RRM1 is indicated by dotted lines. Represented species are as follows: Homo sapiens; mouse, musculus; Rattus norvegicus; Pan troglodytes; Canis; Monodelphis domestica; Gallus gallus; Microcebus murinus; Myotis brandtii; Xenopus tropicalis; Drosophila melanogaster; Danio. (B-C) *Rbm46* mRNA transcripts and its protein abundance were evaluated by qRT-PCR (B) and western blot (C) in various tissues from adult mice. (D) Quantitative RT-PCR analysis of *Rbm46* transcripts in mouse testes at indicated time points. (E) Western blot analysis of RBM46, YTHDC2, and MEIOC during spermatogenesis. GAPDH serves as a loading control. (F-G) Immunofluorescence for RBM46 (green), PNA (red) and DAPI (blue) in adult wild-type testis sections. PNA is an acrosome marker. DNA was counterstained with DAPI. Scale bars: 20  $\mu$ m. Lower panels show magnification image of single cell in the upper panels. Scale bars: 5  $\mu$ m. Abbreviations: Spg, spermatogonia; PL, pre-leptotene; Lep, leptotene; Zyg, zygotene; Pac, pachytene; RS, round spermatids; ES, elongating spermatids.

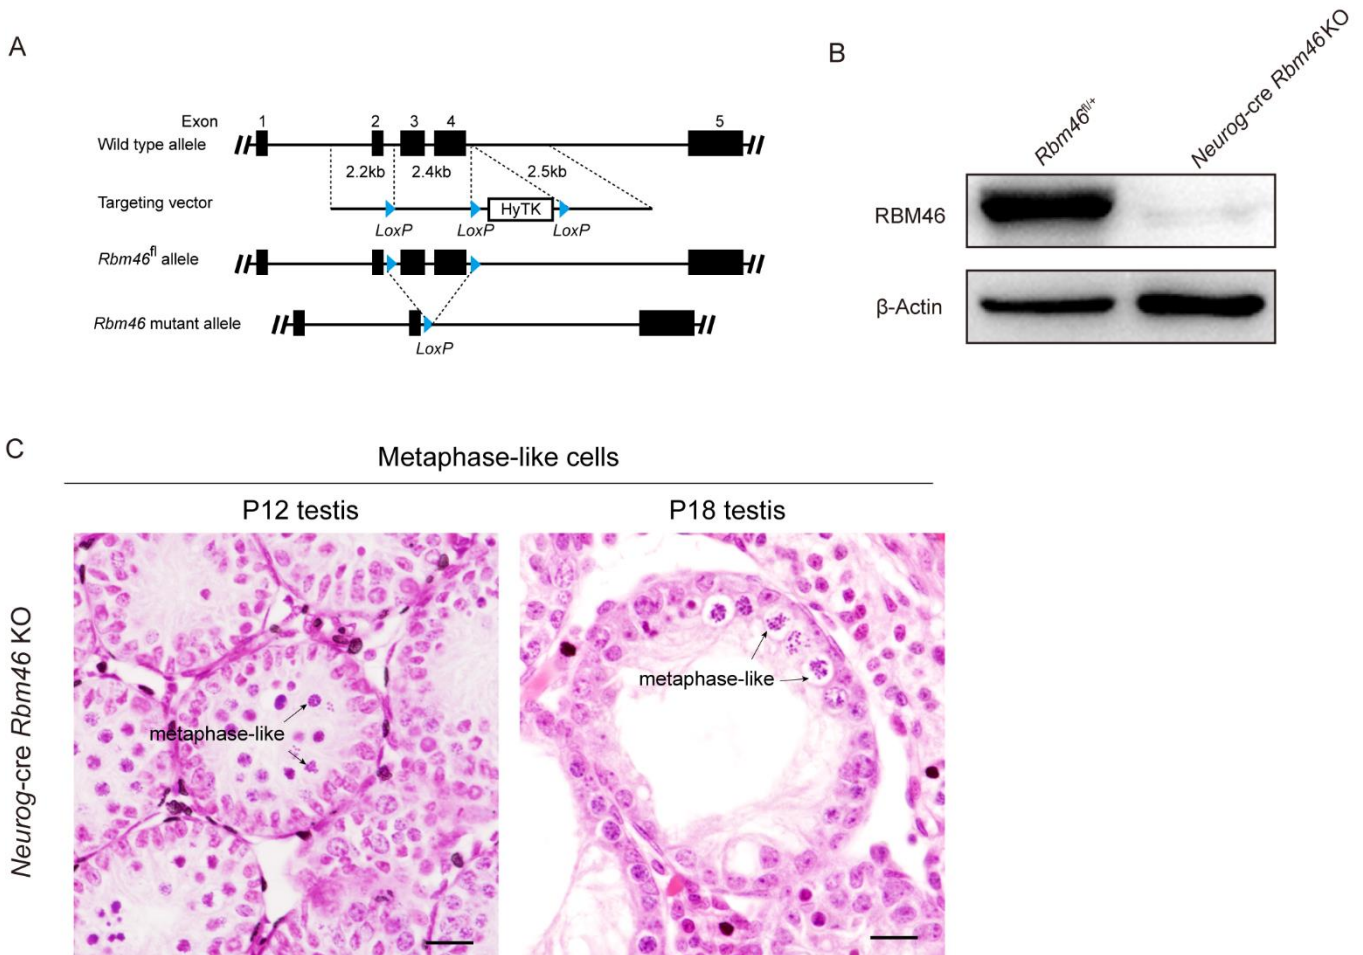

**Fig. S3. Generation of testis-specific *Rbm46* knockout mice.** (A) Genetic strategy for targeted disruption of *Rbm46* gene in mouse testis. *LoxP* sites were inserted into the intron 2 and intron 4 for flanking exon 3 and exon 4, which contain the putative RNA recognition motifs and RNA binding domains. Testis-specific deletion of *Rbm46* was achieved by breeding *Rbm46*<sup>fl/+</sup> to *Neurog-cre* transgenic mice. (B) Western blot analysis of RBM46 protein abundance in P21 wild-type and *Neurog-cre Rbm46* KO testis. (C) Metaphase-like cells with condensed chromosomes were observed *Neurog-cre Rbm46* KO testes at P12 and P18. Scale bar, 20  $\mu$ m.

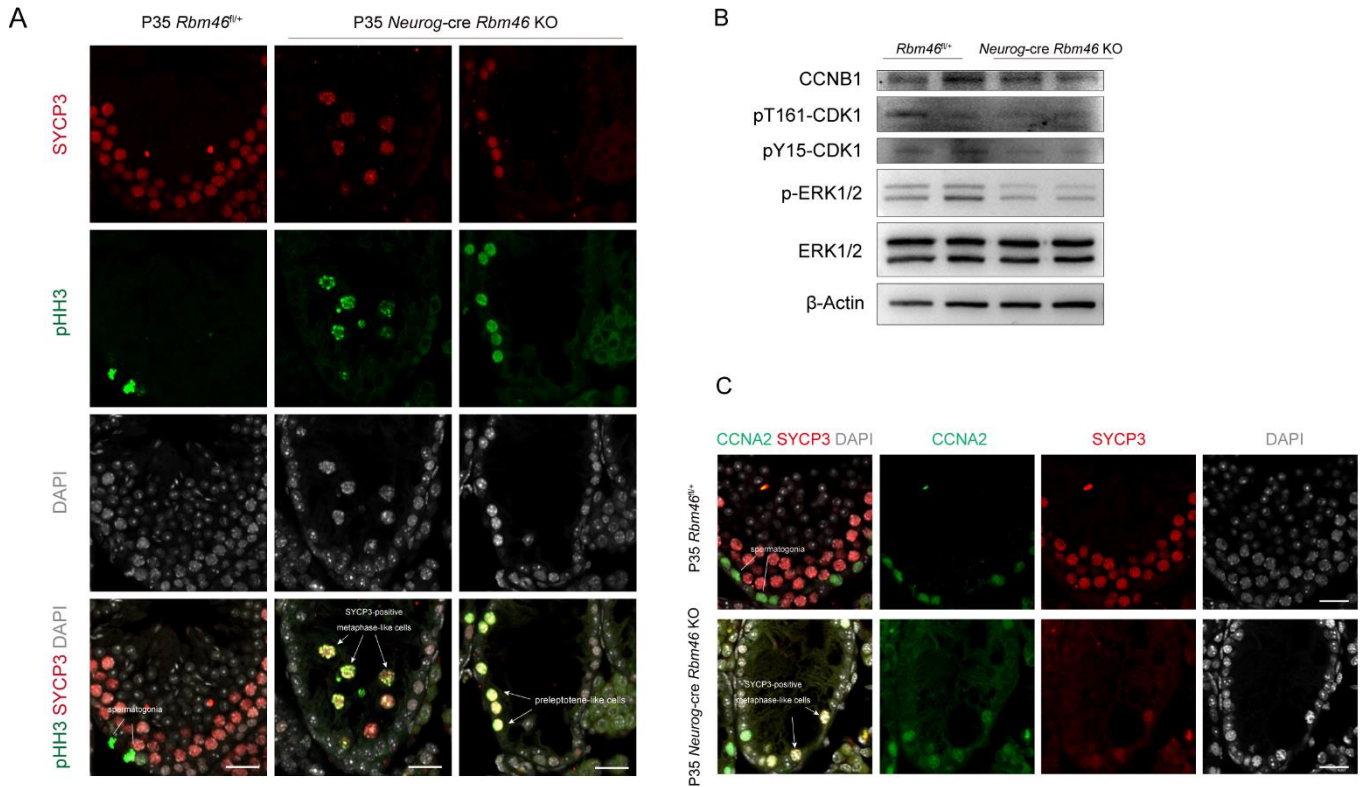

**Fig. S4. *Rbm46* knockout does not affect the maturation-promoting factor complex, a Cyclin-CDK complex that promotes metaphase transition.** (A) Frozen sections from P35 wild-type and *Neurog-cre Rbm46* KO testes were immunostained with pHH3 and SYCP3. (B) Western blot of testes lysates from wild-type and *Neurog-cre Rbm46* KO with the indicated antibodies. pT161-CDK1, phosphorylation of CDK1 at Thr161; pY15-CDK1, phosphorylation of CDK1 at Tyr15. (C) Immunofluorescence analysis with SYCP3 and CCNA2 antibodies on testis sections prepared from P35 WT and *Neurog-cre Rbm46* KO. Metaphase-like cells that express CCNA2 are indicated by arrows. Scale bar, 20  $\mu$ m.

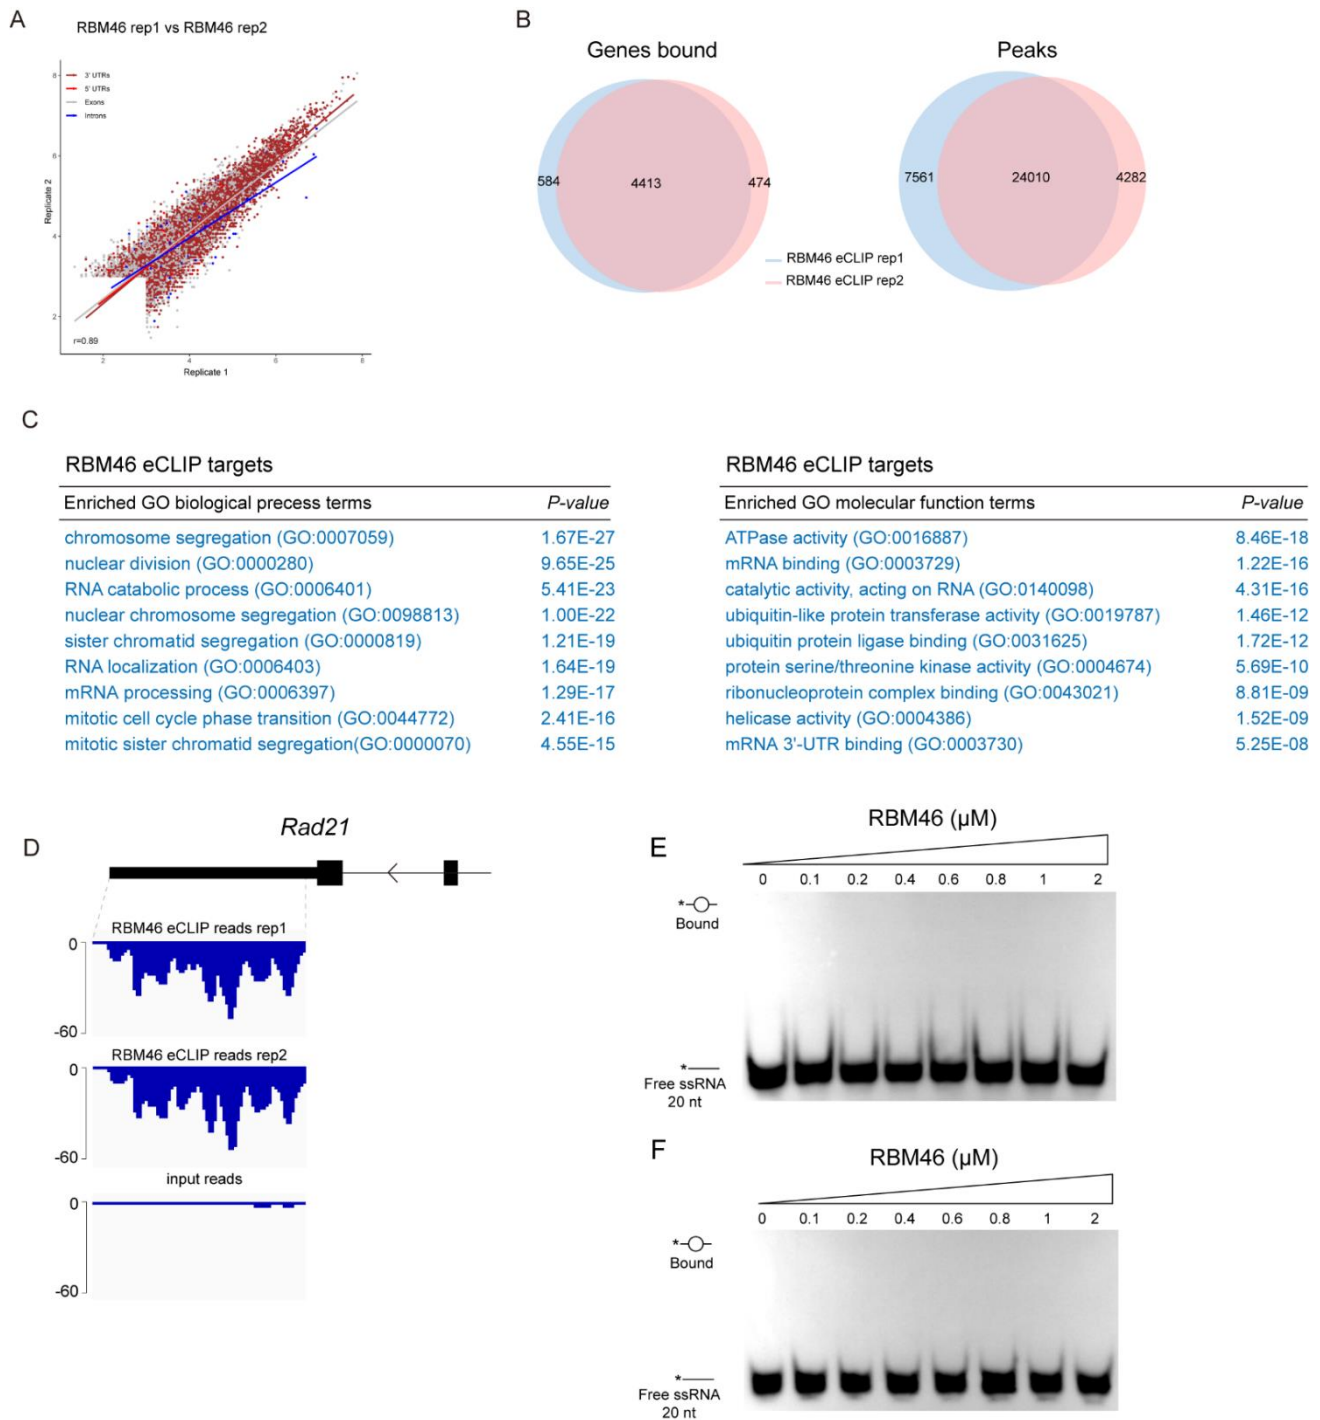

**Fig. S5. RBM46 preferentially binds mitotic-cell-cycle-related transcripts.** (A) Scatter plot indicating correlation ( $r=0.89$ ) between region-based fold enrichment of RBM46 eCLIP-seq across biological duplicates. (B) Overlap between RBM46 peaks and its target genes from biologically two RBM46 eCLIP-seq replicates. RBM46 binding peaks were identified using a stringent parameter ( $P \leq 0.001$ , fold change  $\geq 8$ ). (C) GO biological process and molecular function terms of the top 50% RBM46 targets by eCLIP-seq in testis ( $P \leq 0.001$ , fold change  $\geq 8$ ). (D) Genome browser tracks showing RBM46 eCLIP-seq reads mapped to the 3' UTRs of the mitotic *Rad21* transcripts. (E) EMSA analysis of purified RBM46 protein with a 5' end-labelled single strand RNA probe (ssRNA) without RBM46 binding motif. This 20 nt synthetic ssRNA does not contain the RBM46 binding motif, and its sequence is from *Ccna2* 3' UTR. (F) EMSA experiments show that RBM46 protein doesn't bind a U-rich RNA sequence.

A

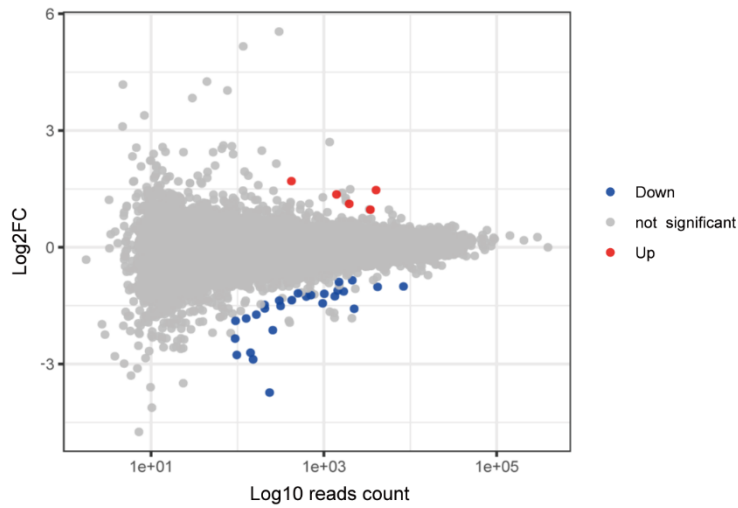

B

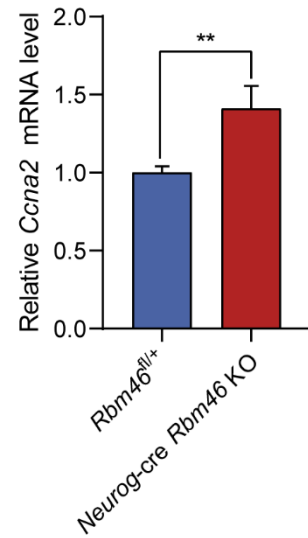

**Fig. S6. Transcriptomic analysis of wild-type and *Neurog-cre Rbm46* KO testes.** (A) RNA-seq analysis of differentially expressed genes in wild-type and *Neurog-cre Rbm46* KO testes at P10, when germ cells just enter meiosis. The upregulated and downregulated genes ( $p < 0.05$ , fold change  $> 1.5$ ) are shown as red dots and blue dots, respectively. Experiments were performed in biological duplicates. (B) *Ccna2* mRNA transcript levels in wild-type and *Neurog-cre Rbm46* KO testes at P14.  $n=3$  for each genotype. \*\*  $P < 0.01$ , Student's t test.

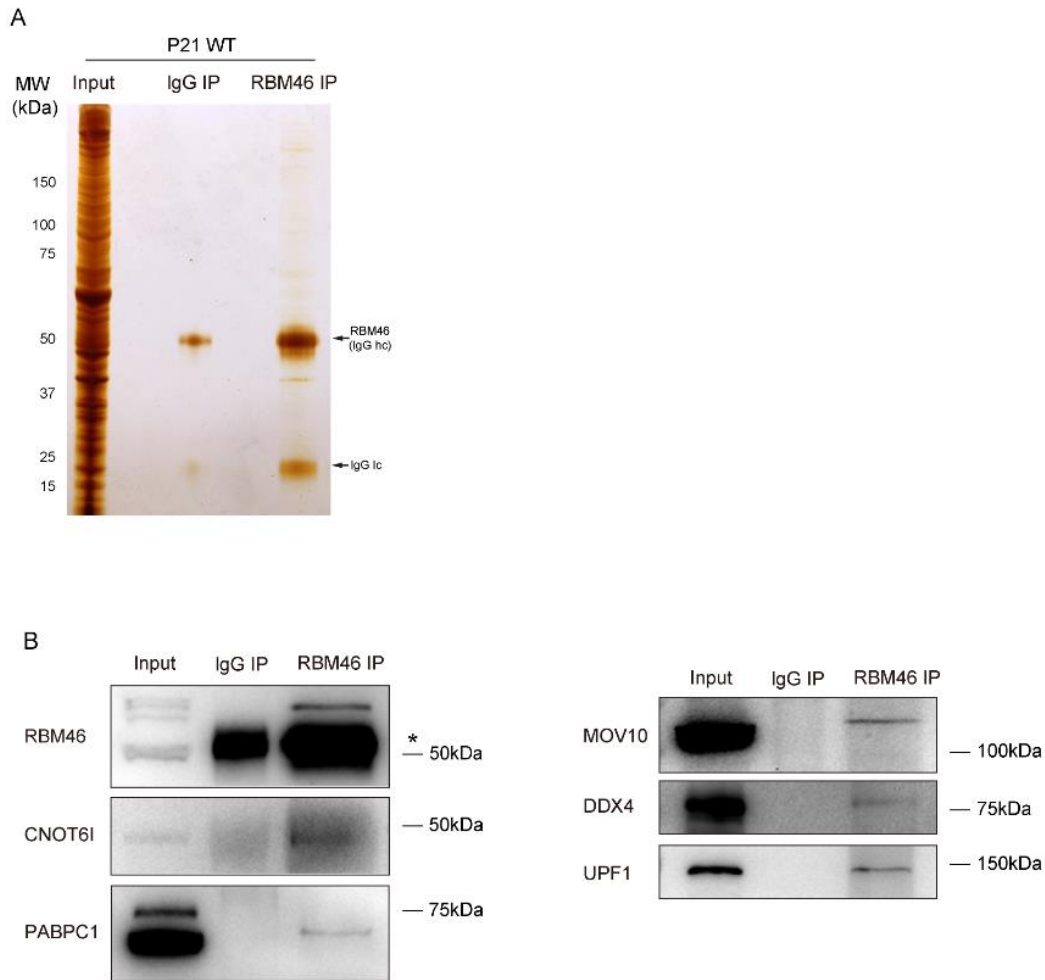

**Fig. S7. RBM46 interacts with P-body components and post-transcriptionally regulates mitotic transcripts.** (A) Identification of RBM46-associating partners by immunoprecipitation experiments either with RBM46 or normal IgG antibodies from mouse testes at P12 and P21. Immunoprecipitated RBM46 protein complexes were separated by SDS-PAGE, and the gel image stained with silver is selectively shown. Testis lysates were prepared from mouse at P12 (n=8) and P21 (n=5). (B) Immunoprecipitation of RBM46 from mouse testes lysates at P21 and western blot with P-body components, including MOV10, CNOT6I, DDX4, PABPC1, and the nonsense-mediated mRNA decay regulator UPF1.



A

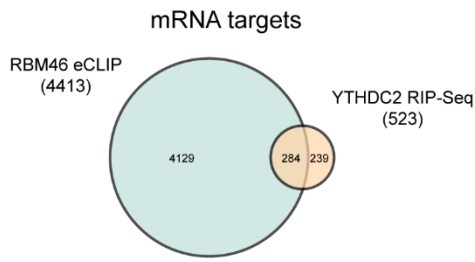

B

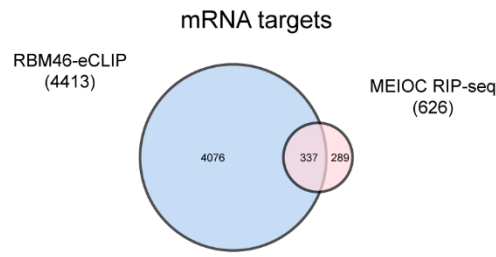

C

### RBM46 binding sites with adult YTHDC2 CLIP targets

within 100 nt window

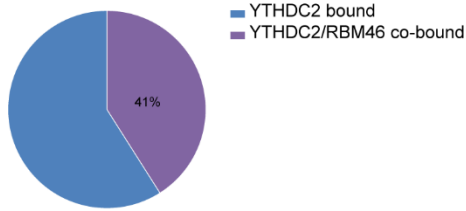

within 70 nt window

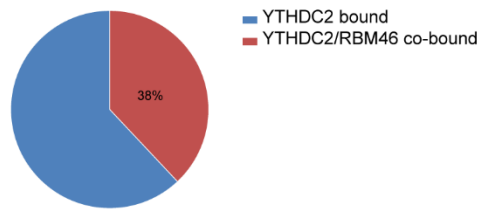

D

#### RBM46 and YTHDC2 shared targets

| Enriched GO biological process terms                       | P-value  |
|------------------------------------------------------------|----------|
| RNA catabolic process (GO:0006401)                         | 2.73E-07 |
| ribonucleoprotein complex biogenesis (GO:0022613)          | 4.66E-06 |
| regulation of RNA stability (GO:0043487)                   | 5.04E-06 |
| ncRNA metabolic process (GO:0034660)                       | 1.07E-05 |
| chromosome segregation (GO:0007059)                        | 1.94E-05 |
| nuclear chromosome segregation (GO:0098813)                | 2.21E-05 |
| positive regulation of protein ubiquitination (GO:0031398) | 5.55E-05 |
| regulation of cell cycle phase transition (GO:1901987)     | 5.87E-05 |

| Enriched GO molecular function terms                     | P-value  |
|----------------------------------------------------------|----------|
| mRNA 3'-UTR binding (GO:0003730)                         | 6.31E-08 |
| mRNA binding (GO:0003729)                                | 4.47E-07 |
| poly(A) binding (GO:0008143)                             | 1.36E-04 |
| miRNA binding (GO:0035198)                               | 1.68E-04 |
| poly-purine tract binding (GO:0070717)                   | 2.91E-04 |
| regulatory RNA binding (GO:0061980)                      | 4.94E-04 |
| ATPase activity (GO:0016887)                             | 6.25E-04 |
| phosphatidylinositol-3-phosphatase activity (GO:0004438) | 1.47E-03 |

E

#### YTHDC2 U-rich motifs by iCLIP-seq

| Motif | P-value |
|-------|---------|
|       | 1E-133  |
|       | 1E-59   |

F

#### Top motifs flanking RBM46 motif within 100 nt

| Motif | P-value |
|-------|---------|
|       | 1E-689  |
|       | 1E-23   |
|       | 1E-23   |

G

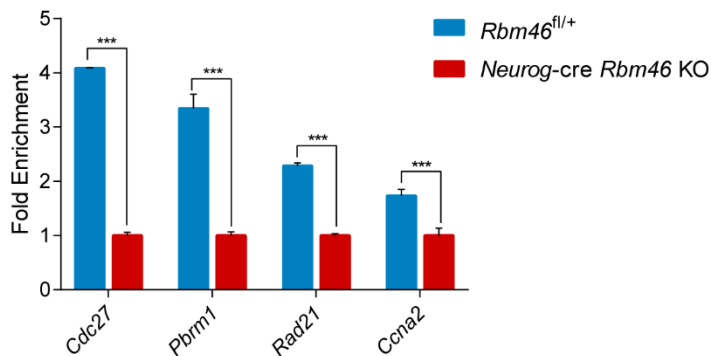

H

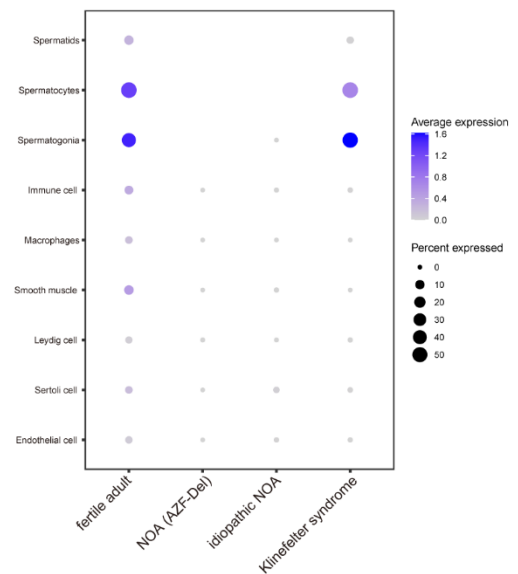

**Fig. S8. Comprehensive analysis of RBM46 eCLIP targets with YTHDC2 binding sites.** (A) Venn diagram depicting the overlap between RBM46 eCLIP targets and YTHDC2-bound mRNA targets identified by RIP-seq (28). A total of 4413 genes with RBM46 eCLIP peaks shared in two RBM46 eCLIP-seq replicates were identified ( $P \leq 0.001$ , fold change  $\geq 8$ ). (B) The overlap between RBM46 eCLIP targets and MEIOC RIP-seq targets. (C) Pie chart depicting the overlap between RBM46 binding sites by eCLIP and adult YTHDC2 CLIP targets within a 100-nt and 70-nt window, respectively. (D) Gene ontology analysis of common mRNAs co-targeted by both RBM46 and YTHDC2. (E) YTHDC2-binding motifs predicted by HOMER analysis from FLAG CLIP-seq in P14 FLAG-tagged *Ythdc2* mice. (F) U-rich motifs were present within a 100-nt window flanking the RBM46 motif. The top three motifs with the most significant  $P$ -value were shown. (G) RIP-qPCR analysis of YTHDC2 recruitment at the previously-determined sites in wild type and *Neurog-cre Rbm46* KO mice at P10-P12.  $n=6-8$  for each genotype. \*\*\*  $P < 0.001$ , Student's t test. (H) Single-cell expression profiling of human *Rbm46* transcripts using a published single-cell datasets. Human cells were derived from fertile adults with normal spermatogenesis (fertile adults), NOA patients with Y chromosome AZF deletion (AZF-Del), idiopathic NOA patients, and NOA patients with Klinefelter syndrome.
